# Supplementary material for: A Transcriptome Analysis Suggests Apoptosis-Related Signaling Pathways in Hemocytes of Spodoptera litura After Parasitization by Microplitis bicoloratus
Source: PLoS One. 2014 Oct 28;9(10):e110967. doi: 10.1371/journal.pone.0110967 (PMC4211697; doi:10.1371/journal.pone.0110967)
Supplement: Table S1 — Sample information. (XLS) [file pone.0110967.s002.xls]

## Sheet: 工作表1
Table S1 Sample informations
Sample type	Total RNA
Sequencer	Illumine Hiseq 2000
Sequencing type	mRNA paired-end
Sequenceing length	2*100 bp
DNA insertion length	160~230 bp
