# Supplementary material for: A Transcriptome Analysis Suggests Apoptosis-Related Signaling Pathways in Hemocytes of Spodoptera litura After Parasitization by Microplitis bicoloratus
Source: PLoS One. 2014 Oct 28;9(10):e110967. doi: 10.1371/journal.pone.0110967 (PMC4211697; doi:10.1371/journal.pone.0110967)
Supplement: Table S2 — Sequencing output and quality. (XLSX) [file pone.0110967.s003.xlsx]

## Sheet: 工作表1
Table S2 Sequencing output and quality
Sample name	M1	M2	S1	S2
Reads number	33134290	36338872	36799602	32369908
Total base number	3.31 G bp	3.63 G bp	3.68 G bp	3.24 G bp
Bases of quality score lager than 30	0.8342	0.8474	0.8218	0.8533
Base number of quality score large than 30	2.77 G bp	3.08 G bp	3.02 G bp	2.76 G bp
