# Supplementary material for: A Transcriptome Analysis Suggests Apoptosis-Related Signaling Pathways in Hemocytes of Spodoptera litura After Parasitization by Microplitis bicoloratus
Source: PLoS One. 2014 Oct 28;9(10):e110967. doi: 10.1371/journal.pone.0110967 (PMC4211697; doi:10.1371/journal.pone.0110967)
Supplement: Table S3 — EST cluster contigs. (XLSX) [file pone.0110967.s004.xlsx]

## Sheet: 工作表1
Table S3 EST cluster contigs
Sample name	M	S	A
Contig Number	15208	15206	20571
Contig length (bp)	977	1219	1026
Contig range	201-12,671	201-29,610	201-29626
M: M1+M2; S: S1+S2;A: M1+M2+S1+S2
